# Supplementary material
Source: PubMed Central journal article supplement (PMC2715516)
Supplement: 0903869106_0903869106SI.pdf [file 0903869106_0903869106SI.pdf]

# Supporting Information

Carter et al. 10.1073/pnas.0903869106

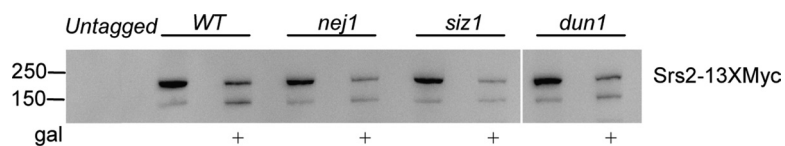

**Fig. S1.** Srs2-13XMyC expression levels. Shown are protein blots using  $\alpha$ -myc antibody (9E10) against Srs2-13XMyC. Whole cell extracts were prepared from the indicated strains (same as Fig. 1) following growth conditions identical to those used for ChIP experiments. Nine micrograms of total protein per sample were loaded. Lanes with cell extracts obtained from cultures grown in galactose are labeled with +.

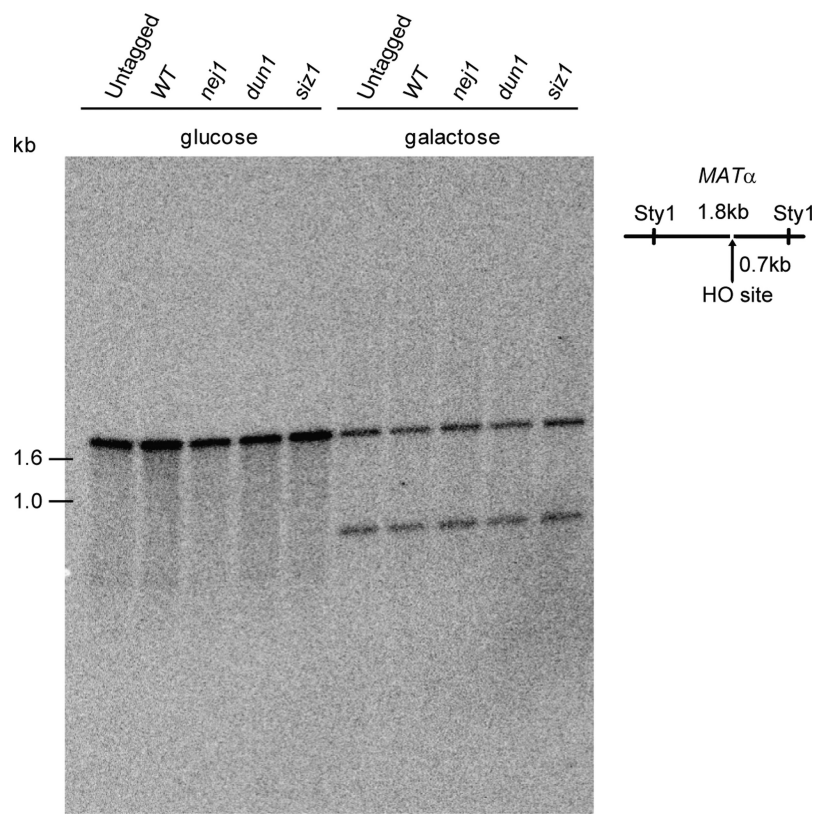

**Fig. S2.** DSB induction in *ChIP* strains. DNA-blot analysis of *StyI*-digested chromosomal DNA from the indicated strains (same as Fig. 1). Growth conditions were identical to those used for *ChIP*. A *MAT*-specific probe was used. The size of the parental band and the HO-digested band are indicated.

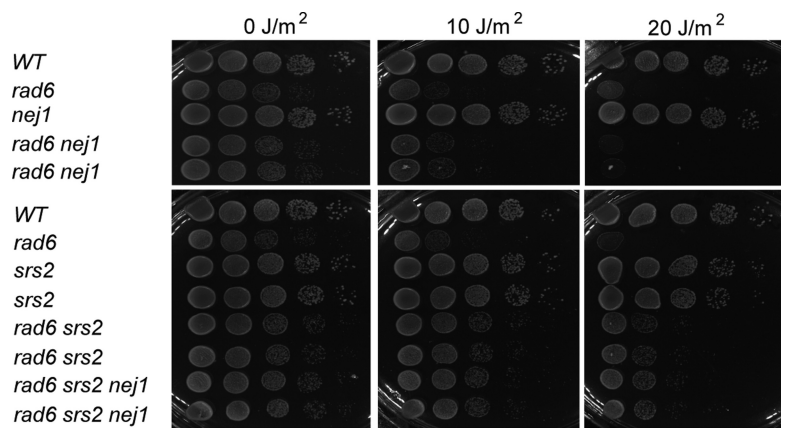

**Fig. S3.** UV sensitivity assay. Ten-fold serial dilutions of the indicated strains (UMY2026, UMY2107, SAY1030, SAY1032, SAY1024, SAY1026, and SAY1028) were spotted on YEPD plates, irradiated at 0, 10, or 20 J/m<sup>2</sup> and incubated in the dark at 30 °C for 48 h.

**Table S1. Strains used in this study**

| Strain  | Genotype                                                                                                                                                                                                                | Source                 |
|---------|-------------------------------------------------------------------------------------------------------------------------------------------------------------------------------------------------------------------------|------------------------|
| JKM115  | <i>MAT<math>\alpha</math> <math>\Delta</math>ho <math>\Delta</math>hml::ade1 <math>\Delta</math>hmr::ADE1 ade1-100 leu2, -3, -112 lys5 ura3-52 trp1::hisG</i>                                                           | (1)                    |
| PJ69-4A | <i>MAT<math>\alpha</math> his3-200 leu2-3,-112 ade2 trp1-901 ura3-52 gal4 gal80 GAL2-ADE2 LYS2::GAL1-HIS3 met2::GAL7-lacZ</i>                                                                                           | (2)                    |
| YW465   | <i>MAT<math>\alpha</math> ade2<math>\Delta</math>0 his3<math>\Delta</math>200 leu2 met15<math>\Delta</math>0 trp1<math>\Delta</math>63 ura3<math>\Delta</math>0</i>                                                     | (3)                    |
| UMY2060 | <i>MAT<math>\alpha</math> ade2 ura3-52 leu2-3,-112 trp1-289 his3<math>\Delta</math>1 lys2-BgIII hom3-10</i>                                                                                                             | Gift from A. Byström   |
| UMY2107 | <i>MAT<math>\alpha</math> ade2 ura3-52 leu2-3,-112 trp1-289 his3<math>\Delta</math>1 lys2-BgIII hom3-10 rad6::URA3</i>                                                                                                  | Gift from A. Byström   |
| SAY215  | <i>MAT<math>\alpha</math> can1-100 his3-11 leu2-3,-112 lys2<math>\Delta</math> trp1-1 ura3-1 nej1::kanMX</i>                                                                                                            | (4)                    |
| SAY230  | <i>MAT<math>\alpha</math> can1-100 his3-11, -15 leu2-3,-112 trp1-1 ura3-1 ade2 5'-URA3-ade2 3' lys2<math>\Delta</math> rad52::TRP1</i>                                                                                  | Gift from L. Symington |
| SAY264  | <i>MAT<math>\alpha</math> <math>\Delta</math>ho <math>\Delta</math>hml::ade1 <math>\Delta</math>hmr::ADE1 ade1-100 leu2, -3, -112 lys5 ura3-52 trp1::hisG nej1::kanMX</i>                                               | (4)                    |
| SAY272  | <i>MAT<math>\alpha</math> <math>\Delta</math>ho <math>\Delta</math>hml::ade1 <math>\Delta</math>hmr::ADE1 ade1-100 leu2, -3, -112 lys5 ura3-52 trp1::hisG srs2::hisG</i>                                                | This study             |
| SAY274  | <i>MAT<math>\alpha</math> <math>\Delta</math>ho <math>\Delta</math>hml::ade1 <math>\Delta</math>hmr::ADE1 ade1-100 leu2, -3, -112 lys5 ura3-52 trp1::hisG srs2::hisG nej1::kanMX</i>                                    | This study             |
| SAY282  | <i>MAT<math>\alpha</math> <math>\Delta</math>ho <math>\Delta</math>hml::ade1 <math>\Delta</math>hmr::ADE1 ade1-100 leu2, -3, -112 lys5 trp1::hisG ura3-52::URA3-pGal-HO</i>                                             | This study             |
| SAY961  | <i>MAT<math>\alpha</math> his3-200 leu2-3,-112 ade2 trp1-901 ura3-52 gal4 gal80 GAL2-ADE2 LYS2::GAL1-HIS3 met2::GAL7-lacZ dun1::kanMX</i>                                                                               | This study             |
| SAY1024 | <i>MAT<math>\alpha</math> ade2 ura3-52 leu2-3,-112 trp1-289 his3<math>\Delta</math>1 lys2-BgIII hom3-10 srs2::NAT</i>                                                                                                   | This study             |
| SAY1026 | <i>MAT<math>\alpha</math> ade2 ura3-52 leu2-3,-112 trp1-289 his3<math>\Delta</math>1 lys2-BgIII hom3-10 rad6::URA3 srs2::NAT</i>                                                                                        | This study             |
| SAY1028 | <i>MAT<math>\alpha</math> ade2 ura3-52 leu2-3,-112 trp1-289 his3<math>\Delta</math>1 lys2-BgIII hom3-10 rad6::URA3 nej1::kanMX srs2::NAT</i>                                                                            | This study             |
| SAY1030 | <i>MAT<math>\alpha</math> ade2 ura3-52 leu2-3,-112 trp1-289 his3<math>\Delta</math>1 lys2-BgIII hom3-10 nej1::kanMX</i>                                                                                                 | This study             |
| SAY1032 | <i>MAT<math>\alpha</math> ade2 ura3-52 leu2-3,-112 trp1-289 his3<math>\Delta</math>1 lys2-BgIII hom3-10 rad6::URA3 nej1::kanMX</i>                                                                                      | This study             |
| SAY1103 | <i>MAT<math>\alpha</math> ade2<math>\Delta</math>0 his3<math>\Delta</math>200 leu2 met15<math>\Delta</math>0 trp1<math>\Delta</math>63 ura3<math>\Delta</math>0 srs2::NAT</i>                                           | This study             |
| SAY1104 | <i>MAT<math>\alpha</math> ade2<math>\Delta</math>0 his3<math>\Delta</math>200 leu2 met15<math>\Delta</math>0 trp1<math>\Delta</math>63 ura3<math>\Delta</math>0 dun1::NAT</i>                                           | This study             |
| SAY1105 | <i>MAT<math>\alpha</math> ade2<math>\Delta</math>0 his3<math>\Delta</math>200 leu2 met15<math>\Delta</math>0 trp1<math>\Delta</math>63 ura3<math>\Delta</math>0 nej1::NAT</i>                                           | This study             |
| SAY1110 | <i>MAT<math>\alpha</math> <math>\Delta</math>ho <math>\Delta</math>hml::ade1 <math>\Delta</math>hmr::ADE1 ade1-100 leu2 -3, -112 lys5 trp1::hisG ura3-52::URA3-pGal-HO SRS2-13XMYC-kanMX</i>                            | This study             |
| SAY1124 | <i>MAT<math>\alpha</math> ade2<math>\Delta</math>0 his3<math>\Delta</math>200 leu2 met15<math>\Delta</math>0 trp1<math>\Delta</math>63 ura3<math>\Delta</math>0 rad52::TRP1</i>                                         | This study             |
| SAY1126 | <i>MAT<math>\alpha</math> <math>\Delta</math>ho <math>\Delta</math>hml::ade1 <math>\Delta</math>hmr::ADE1 ade1-100 leu2 -3, -112 lys5 trp1::hisG ura3-52::URA3-pGal-HO nej1::NAT SRS2-13XMYC-kanMX</i>                  | This study             |
| SAY1180 | <i>MAT<math>\alpha</math> <math>\Delta</math>ho <math>\Delta</math>hml::ade1 <math>\Delta</math>hmr::ADE1 ade1-100 leu2 -3, -112 lys5 trp1::hisG ura3-52::URA3-pGal-HO dun1::NAT SRS2-13XMYC-kanMX</i>                  | This study             |
| SAY1193 | <i>MAT<math>\alpha</math> ade2<math>\Delta</math>0 his3<math>\Delta</math>200 leu2 met15<math>\Delta</math>0 trp1<math>\Delta</math>63 ura3<math>\Delta</math>0 srs2::NAT rad51::kanMX</i>                              | This study             |
| SAY1196 | <i>MAT<math>\alpha</math> <math>\Delta</math>ho <math>\Delta</math>hml::ade1 <math>\Delta</math>hmr::ADE1 ade1-100 leu2 -3, -112 lys5 trp1::hisG ura3-52::URA3-pGal-HO siz1::NAT SRS2-13XMYC-kanMX</i>                  | This study             |
| SAY1197 | <i>MAT<math>\alpha</math> <math>\Delta</math>ho <math>\Delta</math>hml::ade1 <math>\Delta</math>hmr::ADE1 ade1-100 leu2 -3, -112::NEJ1-297AA-LEU2 lys5 trp1::hisG ura3-52::URA3-pGal-HO nej1::NAT SRS2-13XMYC-kanMX</i> | This study             |
| SAY1198 | <i>MAT<math>\alpha</math> ade2<math>\Delta</math>0 his3<math>\Delta</math>200 leu2 met15<math>\Delta</math>0 trp1<math>\Delta</math>63 ura3<math>\Delta</math>0 nej1::kanMX srs2::NAT</i>                               | This study             |
| SAY1199 | <i>MAT<math>\alpha</math> ade2<math>\Delta</math>0 his3<math>\Delta</math>200 leu2 met15<math>\Delta</math>0 trp1<math>\Delta</math>63::NEJ1-297/8AA-TRP1 ura3<math>\Delta</math>0 nej1::NAT</i>                        | This study             |
| SAY1362 | <i>MAT<math>\alpha</math> ade2<math>\Delta</math>0 his3<math>\Delta</math>200 leu2 met15<math>\Delta</math>0 trp1<math>\Delta</math>63 ura3<math>\Delta</math>0 nej1::NAT rad51::kanMX</i>                              | This study             |

1. Moore J K, Haber JE (1996) *Mol Cell Biol* 16:164-173.
2. James P, Halladay, J, Craig EA (1996) *Genetics* 144:1425-1436.
3. Daley JM, Wilson TE (2005) *Mol Cell Biol* 25:896-906.
4. Kegel A, Sjöstrand JO, Åström SU (2001) *Curr Biol* 11:1611-1617.
